# Supplementary material for: Effect of Newborn Resuscitation Training on Health Worker Practices in Pumwani Hospital, Kenya
Source: PLOS journal article supplement (doi:10.1371/journal.pone.0001599), 2008-02-13

### Checklist of items to include when reporting a randomized trial (56-58)

| PAPER SECTION<br>And topic                 | Item | Description                                                                                                                                                                                                                                                                                                                                                                   | Reported<br>on page # |
|--------------------------------------------|------|-------------------------------------------------------------------------------------------------------------------------------------------------------------------------------------------------------------------------------------------------------------------------------------------------------------------------------------------------------------------------------|-----------------------|
| <i>TITLE &amp; ABSTRACT</i>                | 1    | <a href="#">How participants were allocated to interventions</a> (e.g., "random allocation", "randomized", or "randomly assigned").                                                                                                                                                                                                                                           |                       |
| <i>INTRODUCTION</i><br>Background          | 2    | <a href="#">Scientific background and explanation of rationale.</a>                                                                                                                                                                                                                                                                                                           |                       |
| <i>METHODS</i><br>Participants             | 3    | <a href="#">Eligibility criteria for participants</a> and the <a href="#">settings and locations where the data were collected.</a>                                                                                                                                                                                                                                           |                       |
| Interventions                              | 4    | <a href="#">Precise details of the interventions intended for each group and how and when they were actually administered.</a>                                                                                                                                                                                                                                                |                       |
| Objectives                                 | 5    | <a href="#">Specific objectives and hypotheses.</a>                                                                                                                                                                                                                                                                                                                           |                       |
| Outcomes                                   | 6    | <a href="#">Clearly defined primary and secondary outcome measures</a> and, when applicable, any <a href="#">methods used to enhance the quality of measurements</a> (e.g., multiple observations, training of assessors).                                                                                                                                                    |                       |
| Sample size                                | 7    | <a href="#">How sample size was determined</a> and, when applicable, <a href="#">explanation of any interim analyses and stopping rules.</a>                                                                                                                                                                                                                                  |                       |
| Randomization --<br>Sequence generation    | 8    | <a href="#">Method used to generate the random allocation sequence</a> , including <a href="#">details of any restriction</a> (e.g., blocking, stratification).                                                                                                                                                                                                               |                       |
| Randomization --<br>Allocation concealment | 9    | <a href="#">Method used to implement the random allocation sequence</a> (e.g., numbered containers or central telephone), clarifying whether the sequence was concealed until interventions were assigned.                                                                                                                                                                    |                       |
| Randomization --<br>Implementation         | 10   | <a href="#">Who generated the allocation sequence, who enrolled participants, and who assigned participants to their groups.</a>                                                                                                                                                                                                                                              |                       |
| Blinding (masking)                         | 11   | <a href="#">Whether or not participants, those administering the interventions, and those assessing the outcomes were blinded to group assignment.</a> When relevant, <a href="#">how the success of blinding was evaluated.</a>                                                                                                                                              |                       |
| Statistical methods                        | 12   | <a href="#">Statistical methods used to compare groups for primary outcome(s);</a> <a href="#">Methods for additional analyses</a> , such as subgroup analyses and adjusted analyses.                                                                                                                                                                                         |                       |
| RESULTS<br><br>Participant flow            | 13   | <a href="#">Flow of participants through each stage</a> (a diagram is strongly recommended). Specifically, for each group report the numbers of participants randomly assigned, receiving intended treatment, completing the study protocol, and analyzed for the primary outcome. <a href="#">Describe protocol deviations from study as planned, together with reasons.</a> |                       |
| Recruitment                                | 14   | <a href="#">Dates defining the periods of recruitment and follow-up.</a>                                                                                                                                                                                                                                                                                                      |                       |
| Baseline data                              | 15   | <a href="#">Baseline demographic and clinical characteristics of each group.</a>                                                                                                                                                                                                                                                                                              |                       |
| Numbers analyzed                           | 16   | <a href="#">Number of participants (denominator) in each group included in each analysis and whether the analysis was by "intention-to-treat"</a> . State the results in absolute numbers when feasible (e.g., 10/20, not 50%).                                                                                                                                               |                       |
| Outcomes and estimation                    | 17   | <a href="#">For each primary and secondary outcome, a summary of results for each group, and the estimated effect size and its precision</a> (e.g., 95% confidence interval).                                                                                                                                                                                                 |                       |
| Ancillary analyses                         | 18   | <a href="#">Address multiplicity by reporting any other analyses performed</a> , including subgroup analyses and adjusted analyses, indicating those pre-specified and those exploratory.                                                                                                                                                                                     |                       |
| Adverse events                             | 19   | <a href="#">All important adverse events or side effects in each intervention group.</a>                                                                                                                                                                                                                                                                                      |                       |
| DISCUSSION<br>Interpretation               | 20   | <a href="#">Interpretation of the results</a> , taking into account study hypotheses, sources of potential bias or imprecision and the dangers associated with multiplicity of analyses and outcomes.                                                                                                                                                                         |                       |
| Generalizability                           | 21   | <a href="#">Generalizability (external validity) of the trial findings.</a>                                                                                                                                                                                                                                                                                                   |                       |
| Overall evidence                           | 22   | <a href="#">General interpretation of the results in the context of current evidence.</a>                                                                                                                                                                                                                                                                                     |                       |

Revised template of the CONSORT diagram showing the flow of participants through each stage of a randomized trial.

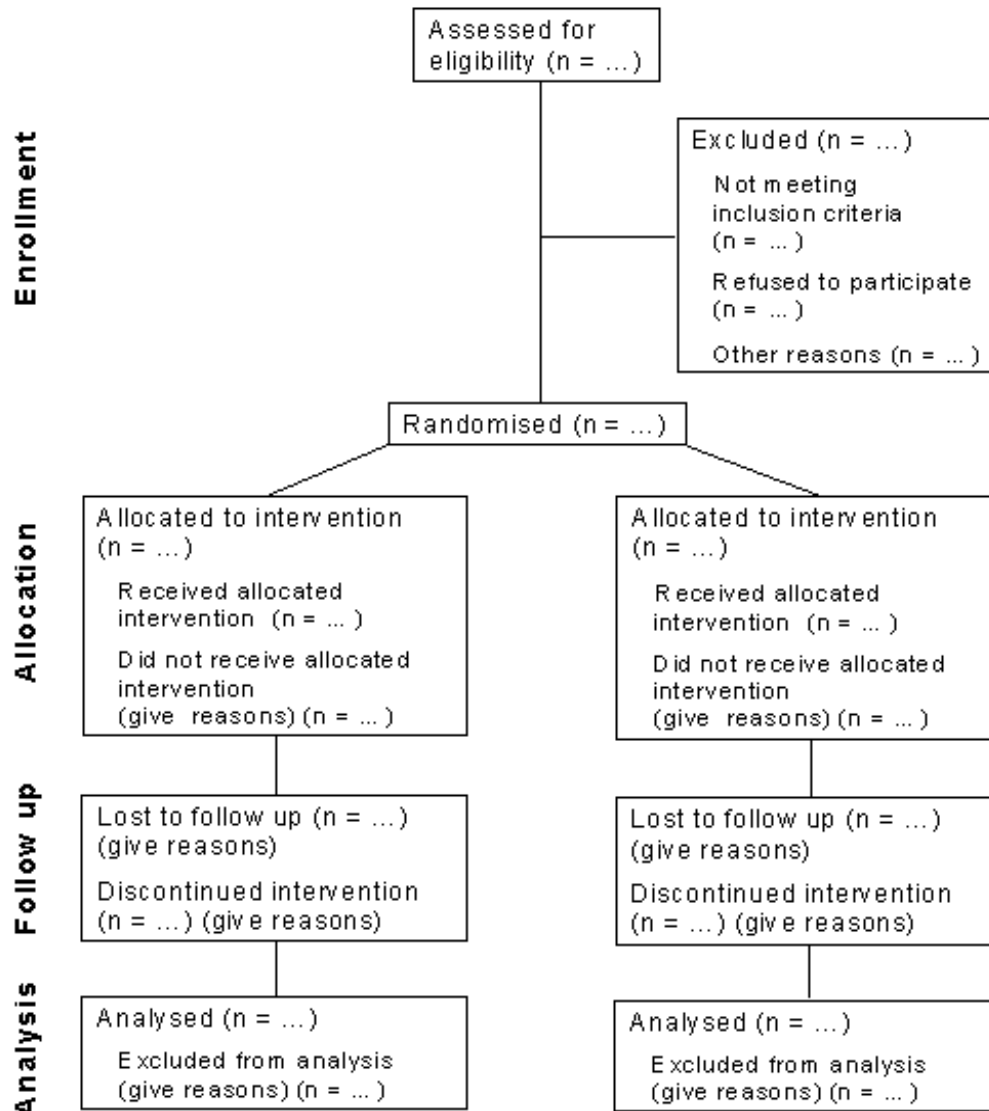

Supplement: S1 (10.1371/journal.pone.0001599.s001) [file journal.pone.0001599.s001]
